# Supplementary material
Source: publisher site journal article supplement (https://www.dovepress.com/article/322563)
Supplement: Supplementary file 1 [file get_supplementary_file.php]

Table S1 Drug susceptibility results of 90 MTB isolates by the proportion method using the BACTEC MGIT 960 system

| MTB isolates ID | SM | INH | RIF | EMB | MFX | Pa | RFB | RFP | PZA |
|-----------------|----|-----|-----|-----|-----|----|-----|-----|-----|
| Y1              | R  | R   | R   | S   | R   | R  | R   | R   | S   |
| Y2              | R  | R   | R   | R   | S   | R  | R   | R   | R   |
| Y3              | R  | R   | R   | R   | R   | R  | R   | R   | R   |
| Y4              | R  | R   | R   | R   | R   | R  | R   | R   | R   |
| Y5              | R  | R   | R   | R   | R   | R  | R   | R   | R   |
| Y6              | R  | R   | R   | R   | R   | R  | R   | R   | R   |
| Y7              | R  | R   | R   | R   | R   | R  | R   | R   | R   |
| Y11             | S  | R   | S   | S   | R   | S  | R   | S   | S   |
| Y12             | S  | R   | R   | S   | R   | R  | R   | R   | S   |
| Y15             | S  | R   | R   | S   | R   | R  | R   | R   | S   |
| Y16             | R  | R   | R   | R   | R   | R  | R   | R   | R   |
| Y17             | S  | R   | R   | R   | S   | S  | R   | R   | S   |
| Y29             | R  | R   | R   | S   | R   | S  | R   | R   | S   |
| Y37             | R  | R   | R   | R   | R   | R  | R   | R   | R   |
| Y46             | R  | R   | R   | R   | R   | R  | R   | R   | S   |
| Y47             | R  | R   | R   | R   | R   | S  | S   | R   | R   |
| Y48             | R  | R   | R   | R   | S   | S  | R   | R   | R   |
| Y49             | R  | R   | R   | R   | R   | R  | R   | R   | R   |
| Y50             | R  | R   | R   | R   | R   | R  | R   | R   | R   |
| Y51             | R  | R   | R   | R   | R   | R  | R   | R   | R   |
| Y52             | R  | R   | R   | R   | R   | R  | R   | R   | R   |
| Y53             | R  | R   | R   | R   | R   | R  | R   | R   | R   |
| Y54             | R  | R   | R   | R   | R   | R  | R   | R   | R   |
| Y55             | R  | R   | R   | R   | R   | R  | R   | R   | R   |
| Y56             | R  | R   | R   | S   | R   | S  | S   | S   | S   |
| Y57             | R  | R   | R   | R   | R   | R  | R   | R   | R   |
| Y58             | R  | R   | R   | R   | R   | R  | R   | R   | R   |
| Y59             | R  | R   | R   | R   | R   | S  | R   | R   | R   |
| Y60             | R  | R   | R   | R   | R   | S  | S   | R   | R   |
| Y61             | R  | R   | R   | R   | R   | S  | S   | S   | R   |
| Y62             | R  | R   | R   | R   | S   | S  | S   | S   | R   |
| Y63             | R  | R   | R   | R   | R   | S  | R   | R   | R   |
| Y65             | R  | R   | R   | R   | R   | S  | R   | R   | R   |
| Y68             | R  | R   | R   | S   | R   | S  | S   | R   | R   |
| Y71             | S  | R   | R   | S   | R   | S  | R   | R   | S   |
| Y72             | R  | R   | R   | S   | R   | S  | R   | S   | S   |
| Y73             | R  | R   | R   | R   | R   | S  | R   | R   | R   |
| Y76             | R  | R   | R   | R   | R   | S  | R   | R   | R   |
| Y78             | R  | R   | R   | R   | R   | S  | R   | R   | R   |
| Y79             | R  | R   | R   | R   | R   | R  | R   | R   | S   |
| Y80             | R  | R   | R   | R   | R   | R  | R   | R   | S   |
| Y81             | R  | R   | R   | R   | R   | R  | R   | R   | S   |
| Y83             | S  | R   | R   | S   | R   | R  | R   | R   | S   |
| Y84             | R  | R   | R   | R   | R   | R  | R   | R   | R   |
| Y85             | R  | R   | R   | R   | R   | R  | R   | R   | S   |
| Y88             | R  | R   | R   | R   | R   | R  | R   | R   | R   |
| Y89             | R  | R   | R   | S   | S   | S  | R   | R   | R   |
| Y94             | R  | R   | R   | R   | R   | R  | R   | R   | R   |
| Y95             | R  | R   | R   | R   | R   | R  | R   | R   | R   |
| Y97             | S  | R   | R   | R   | R   | R  | R   | R   | S   |
| Y98             | S  | R   | S   | S   | S   | S  | S   | S   | S   |

|      |   |   |   |   |   |   |   |   |   |
|------|---|---|---|---|---|---|---|---|---|
| Y105 | R | R | R | R | R | R | R | R | R |
| Y107 | S | R | S | S | S | S | R | R | S |
| Y108 | S | R | R | S | R | R | R | R | S |
| Y109 | R | R | R | S | R | R | R | R | S |
| Y111 | R | R | R | R | S | R | R | R | R |
| Y112 | R | R | R | R | S | R | R | R | R |
| Y114 | R | R | R | S | R | R | R | R | S |
| Y116 | R | R | R | S | R | R | R | R | S |
| Y117 | S | R | R | S | S | R | R | R | R |
| Y118 | R | R | R | R | R | R | R | R | R |
| Y121 | S | R | S | S | S | R | R | R | R |
| Y122 | S | R | S | S | S | R | R | R | R |
| Y123 | R | R | R | R | R | R | R | R | R |
| Y125 | S | R | R | R | R | S | R | R | R |
| Y126 | R | R | R | R | R | R | R | R | R |
| Y144 | S | R | R | S | S | R | R | R | S |
| Y158 | R | R | R | R | R | R | R | R | R |
| Y162 | R | R | R | R | R | S | R | R | R |
| Y165 | S | R | R | R | R | S | R | R | R |
| Y170 | S | R | R | R | R | S | R | R | R |
| Y182 | R | R | R | S | S | S | R | R | R |
| Y183 | R | R | S | S | S | S | S | S | S |
| Y184 | R | R | R | R | R | R | R | R | R |
| Y186 | R | R | R | R | S | S | R | R | S |
| Y189 | S | R | S | S | S | S | S | S | S |
| Y193 | R | R | R | S | R | R | R | R | R |
| Y200 | S | R | S | S | S | S | S | S | S |
| Y208 | R | R | R | S | R | R | R | R | R |
| Y209 | R | R | R | R | R | S | R | R | R |
| Y214 | R | R | R | R | R | R | R | R | R |
| Y218 | R | R | R | S | S | S | R | R | S |
| Y220 | R | R | R | R | R | R | R | R | R |
| Y223 | R | R | R | S | R | S | R | R | R |
| Y252 | S | R | R | S | R | S | R | R | R |
| Y253 | S | R | S | S | S | S | S | S | S |
| Y256 | S | R | R | R | S | S | R | R | R |
| Y258 | R | R | R | R | R | S | R | R | R |
| Y259 | R | R | R | R | S | S | R | R | R |
| Y260 | S | R | R | S | R | S | R | R | R |

Table S2. MIC and FICI results of 90 MTB isolates by the checkerboard titration methods for INH and RIF, Pa and RFB, Pa and RFP combinations

| MTB isolates ID | INH (MIC alone) | INH (MIC combination) | RIF (MIC alone) | RIF (MIC combination) | FICI  | Pa (MIC alone) | Pa (MIC combination) | RFB (MIC alone) | RFB (MIC combination) | FICI   | Pa (MIC alone) | Pa (MIC combination) | RFP (MIC alone) | RFP (MIC combination) | FICI     |
|-----------------|-----------------|-----------------------|-----------------|-----------------------|-------|----------------|----------------------|-----------------|-----------------------|--------|----------------|----------------------|-----------------|-----------------------|----------|
| Y1              | 2               | 1                     | 32              | 32                    | 1.5   | 0.015          | 0.0075               | 1               | 0.5                   | 1      | 0.015          | 0.0075               | 8               | 4                     | 1        |
| Y2              | 4               | 8                     | 8               | 0.03                  | 2     | 0.5            | 0.06                 | 1               | 1                     | 1.12   | 0.5            | 0.06                 | 16              | 2                     | 0.245    |
| Y3              | 4               | 1                     | 32              | 32                    | 1.25  | 32             | 1                    | 4               | 2                     | 0.5313 | 32             | 0.5                  | 32              | 4                     | 0.140625 |
| Y4              | 4               | 1                     | 32              | 32                    | 1.25  | 1              | 0.5                  | 4               | 0.0313                | 0.5078 | 8              | 0.25                 | 32              | 2                     | 0.09375  |
| Y5              | 4               | 4                     | 16              | 0.03                  | 1     | 2              | 1                    | 4               | 0.0313                | 0.51   | 2              | 1                    | 8               | 0.25                  | 0.53     |
| Y6              | 4               | 2                     | 32              | 8                     | 0.75  | 1              | 0.25                 | 4               | 2                     | 0.75   | 1              | 0.125                | 32              | 8                     | 0.375    |
| Y7              | 4               | 2                     | 32              | 16                    | 1     | 0.5            | 0.5                  | 4               | 0.0313                | 1.0625 | 0.5            | 0.06                 | 32              | 4                     | 0.245    |
| Y11             | 2               | 2                     | 64              | 0.5                   | 1     | 4              | 0.0075               | 0.0625          | 0.0313                | 0.5019 | 4              | 0.0075               | 0.5             | 0.25                  | 0.501875 |
| Y12             | 2               | 1                     | 2               | 1                     | 1     | 16             | 0.0075               | 1               | 1                     | 1      | 16             | 2                    | 8               | 4                     | 0.625    |
| Y15             | 2               | 1                     | 1               | 1                     | 1.5   | 2              | 0.5                  | 0.5             | 0.0625                | 0.375  | 2              | 0.125                | 4               | 0.5                   | 0.1875   |
| Y16             | 8               | 4                     | 32              | 8                     | 0.75  | 4              | 2                    | 8               | 0.0313                | 0.248  | 4              | 0.5                  | 32              | 2                     | 0.1875   |
| Y17             | 8               | 8                     | 32              | 4                     | 1.125 | 0.5            | 0.125                | 4               | 0.125                 | 0.2813 | 0.5            | 0.125                | 32              | 4                     | 0.375    |
| Y29             | 2               | 2                     | 64              | 16                    | 1.25  | 4              | 0.5                  | 4               | 2                     | 0.625  | 2              | 0.25                 | 8               | 8                     | 1.125    |
| Y37             | 2               | 8                     | 64              | 0.03                  | 4     | 0.5            | 0.25                 | 4               | 0.0313                | 0.51   | 0.5            | 0.125                | 32              | 8                     | 0.5      |
| Y46             | 2               | 4                     | 64              | 0.03                  | 2     | 2              | 2                    | 8               | 2                     | 1.25   | 2              | 0.03                 | 32              | 16                    | 0.515    |
| Y47             | 8               | 8                     | 32              | 0.5                   | 1.01  | 2              | 0.5                  | 1               | 0.5                   | 0.75   | 2              | 0.03                 | 4               | 2                     | 0.515    |
| Y48             | 16              | 2                     | 32              | 0.06                  | 0.125 | 2              | 0.5                  | 4               | 2                     | 0.75   | 0.25           | 0.25                 | 4               | 16                    | 1.5      |
| Y49             | 4               | 4                     | 2               | 2                     | 2     | 2              | 0.125                | 2               | 0.5                   | 0.3125 | 2              | 0.25                 | 4               | 1                     | 0.375    |
| Y50             | 1               | 2                     | 64              | 0.03                  | 2     | 2              | 2                    | 4               | 0.0313                | 1      | 2              | 0.5                  | 32              | 8                     | 0.5      |
| Y51             | 8               | 4                     | 2               | 2                     | 1.5   | 2              | 0.0075               | 2               | 1                     | 0.5038 | 1              | 0.0075               | 8               | 4                     | 0.5075   |
| Y52             | 16              | 2                     | 32              | 32                    | 1.125 | 1              | 0.5                  | 4               | 0.125                 | 0.5313 | 0.5            | 0.5                  | 16              | 0.25                  | 1.02     |
| Y53             | 1               | 2                     | 64              | 0.03                  | 2     | 2              | 0.25                 | 4               | 2                     | 0.625  | 2              | 1                    | 32              | 16                    | 1        |
| Y54             | 2               | 2                     | 32              | 16                    | 1.5   | 0.5            | 2                    | 4               | 0.0313                | 4      | 2              | 0.125                | 32              | 8                     | 0.3125   |
| Y55             | 1               | 1                     | 0.5             | 0.5                   | 2     | 0.5            | 1                    | 4               | 0.0313                | 2      | 0.125          | 0.125                | 32              | 16                    | 1.5      |
| Y56             | 1               | 1                     | 16              | 16                    | 2     | 8              | 2                    | 4               | 1                     | 0.5    | 4              | 4                    | 32              | 16                    | 1.5      |
| Y57             | 4               | 4                     | 2               | 1                     | 1.5   | 2              | 2                    | 1               | 0.0625                | 1.0625 | 0.25           | 0.0075               | 16              | 4                     | 0.28     |
| Y58             | 8               | 8                     | 2               | 0.25                  | 1.125 | 1              | 1                    | 1               | 0.0313                | 1.0313 | 4              | 0.0075               | 16              | 8                     | 0.501875 |
| Y59             | 4               | 4                     | 1               | 0.03                  | 1.03  | 1              | 0.25                 | 1               | 0.0313                | 0.2813 | 1              | 0.06                 | 4               | 2                     | 0.56     |

|      |      |       |       |       |       |      |        |     |        |        |       |        |    |      |          |
|------|------|-------|-------|-------|-------|------|--------|-----|--------|--------|-------|--------|----|------|----------|
| Y60  | 4    | 4     | 4     | 2     | 1.5   | 4    | 1      | 2   | 1      | 0.75   | 2     | 0.125  | 8  | 4    | 0.5625   |
| Y61  | 4    | 4     | 1     | 0.5   | 1.5   | 2    | 0.25   | 1   | 1      | 1.125  | 2     | 0.125  | 4  | 4    | 1.0625   |
| Y62  | 2    | 0.125 | 4     | 4     | 1.06  | 8    | 2      | 4   | 2      | 0.75   | 8     | 2      | 16 | 8    | 0.75     |
| Y63  | 1    | 2     | 2     | 1     | 2.5   | 0.5  | 0.06   | 1   | 0.25   | 0.37   | 0.5   | 0.25   | 4  | 0.25 | 0.5625   |
| Y65  | 2    | 2     | 64    | 16    | 1.25  | 8    | 4      | 4   | 0.0313 | 0.5078 | 8     | 4      | 32 | 0.25 | 0.507813 |
| Y68  | 16   | 2     | 16    | 0.5   | 0.15  | 0.03 | 0.0075 | 0.5 | 0.25   | 0.75   | 0.25  | 0.06   | 4  | 0.5  | 0.365    |
| Y71  | 0.5  | 0.5   | 0.125 | 0.125 | 2     | 0.5  | 0.06   | 4   | 1      | 0.37   | 0.5   | 0.25   | 32 | 1    | 0.53125  |
| Y72  | 16   | 4     | 64    | 64    | 1.25  | 0.5  | 0.125  | 8   | 0.25   | 0.2813 | 0.5   | 0.25   | 32 | 0.5  | 0.515625 |
| Y73  | 16   | 4     | 64    | 0.25  | 0.25  | 2    | 1      | 4   | 0.5    | 0.625  | 8     | 0.125  | 64 | 16   | 0.265625 |
| Y76  | 0.5  | 1     | 32    | 16    | 2.5   | 4    | 4      | 4   | 0.0313 | 1      | 4     | 2      | 32 | 16   | 1        |
| Y78  | 1    | 0.5   | 16    | 8     | 1     | 2    | 2      | 4   | 2      | 1.5    | 2     | 0.5    | 32 | 16   | 0.75     |
| Y79  | 2    | 1     | 4     | 2     | 1     | 16   | 0.0075 | 2   | 2      | 1      | 16    | 0.0075 | 16 | 16   | 1        |
| Y80  | 16   | 2     | 2     | 1     | 0.625 | 16   | 0.0075 | 2   | 2      | 1      | 16    | 0.06   | 8  | 8    | 1.00375  |
| Y81  | 1    | 2     | 1     | 0.03  | 2.03  | 16   | 0.0075 | 2   | 2      | 1      | 16    | 0.0075 | 8  | 16   | 2        |
| Y83  | 1    | 2     | 1     | 0.25  | 2.25  | 4    | 4      | 4   | 0.0313 | 1      | 4     | 0.5    | 64 | 8    | 0.25     |
| Y84  | 0.5  | 0.25  | 32    | 8     | 0.75  | 2    | 1      | 4   | 0.0313 | 0.51   | 4     | 2      | 64 | 0.25 | 0.5      |
| Y85  | 2    | 1     | 2     | 2     | 1.5   | 2    | 2      | 1   | 0.0313 | 1      | 4     | 2      | 8  | 0.25 | 0.53125  |
| Y88  | 8    | 4     | 32    | 2     | 0.56  | 0.06 | 0.25   | 4   | 0.0313 | 4.17   | 1     | 0.5    | 32 | 16   | 1        |
| Y89  | 16   | 2     | 32    | 2     | 0.18  | 4    | 4      | 8   | 0.0313 | 1.0039 | 4     | 4      | 64 | 0.25 | 1        |
| Y94  | 0.5  | 1     | 2     | 1     | 2.5   | 8    | 1      | 4   | 0.5    | 0.25   | 4     | 0.5    | 64 | 0.25 | 0.1289   |
| Y95  | 1    | 1     | 16    | 0.06  | 1     | 1    | 0.5    | 4   | 0.0625 | 0.52   | 2     | 0.125  | 32 | 8    | 0.3125   |
| Y97  | 0.25 | 0.25  | 16    | 16    | 2     | 0.5  | 0.125  | 2   | 0.0313 | 0.27   | 0.5   | 0.25   | 32 | 0.25 | 0.51     |
| Y98  | 4    | 4     | 1     | 1     | 2     | 4    | 0.25   | 0.5 | 0.0625 | 0.1875 | 4     | 0.5    | 2  | 0.25 | 0.25     |
| Y105 | 1    | 1     | 0.5   | 0.5   | 2     | 4    | 4      | 8   | 2      | 1.25   | 32    | 4      | 64 | 16   | 0.375    |
| Y107 | 16   | 0.125 | 0.5   | 0.5   | 1     | 4    | 2      | 0.5 | 0.0313 | 0.5625 | 4     | 2      | 4  | 0.25 | 0.5625   |
| Y108 | 0.5  | 1     | 64    | 0.03  | 2     | 1    | 0.5    | 4   | 0.0313 | 0.5078 | 1     | 0.25   | 64 | 8    | 0.375    |
| Y109 | 16   | 4     | 32    | 4     | 0.375 | 16   | 8      | 4   | 2      | 1      | 16    | 4      | 32 | 16   | 0.75     |
| Y111 | 0.5  | 0.5   | 0.5   | 0.125 | 1.25  | 4    | 0.5    | 1   | 1      | 1.125  | 1     | 0.0075 | 4  | 8    | 2        |
| Y112 | 16   | 16    | 64    | 32    | 1.5   | 0.06 | 0.25   | 4   | 0.0313 | 4.17   | 0.125 | 0.06   | 32 | 16   | 0.98     |
| Y114 | 4    | 4     | 64    | 4     | 1.06  | 4    | 2      | 4   | 0.0313 | 0.51   | 1     | 0.06   | 32 | 16   | 0.56     |
| Y116 | 1    | 1     | 64    | 32    | 1.5   | 16   | 8      | 4   | 0.0625 | 0.5156 | 16    | 8      | 32 | 4    | 0.625    |
| Y117 | 16   | 8     | 64    | 16    | 0.75  | 4    | 2      | 8   | 2      | 0.75   | 8     | 4      | 64 | 0.25 | 0.5      |
| Y118 | 2    | 4     | 64    | 0.03  | 2     | 0.5  | 0.5    | 4   | 0.0313 | 1      | 0.25  | 0.25   | 32 | 0.5  | 1.0156   |

|      |       |       |      |       |       |      |        |        |        |        |       |        |     |      |         |
|------|-------|-------|------|-------|-------|------|--------|--------|--------|--------|-------|--------|-----|------|---------|
| Y121 | 4     | 1     | 0.5  | 0.5   | 1.25  | 0.25 | 0.0075 | 0.5    | 0.5    | 1.03   | 4     | 0.0075 | 2   | 2    | 1       |
| Y122 | 4     | 0.5   | 0.5  | 0.125 | 0.375 | 16   | 0.0075 | 0.5    | 0.5    | 1      | 8     | 0.0075 | 4   | 2    | 0.5     |
| Y123 | 4     | 1     | 32   | 32    | 1.25  | 32   | 16     | 4      | 1      | 0.75   | 32    | 4      | 32  | 16   | 0.625   |
| Y125 | 16    | 4     | 64   | 64    | 1.25  | 0.25 | 0.25   | 8      | 0.0031 | 1      | 1     | 0.5    | 64  | 8    | 0.625   |
| Y126 | 1     | 2     | 16   | 0.06  | 2     | 16   | 4      | 4      | 4      | 1.25   | 32    | 4      | 64  | 16   | 0.375   |
| Y144 | 8     | 2     | 16   | 0.03  | 0.25  | 16   | 8      | 4      | 1      | 0.75   | 16    | 4      | 64  | 16   | 0.5     |
| Y158 | 8     | 4     | 1    | 0.03  | 0.53  | 4    | 8      | 4      | 1      | 2.25   | 16    | 0.5    | 32  | 16   | 0.53125 |
| Y162 | 8     | 4     | 4    | 0.5   | 0.625 | 2    | 1      | 1      | 1      | 1.5    | 4     | 0.125  | 8   | 8    | 1.03125 |
| Y165 | 1     | 1     | 64   | 32    | 1.5   | 8    | 4      | 4      | 4      | 1.5    | 16    | 4      | 64  | 16   | 0.5     |
| Y170 | 16    | 0.125 | 32   | 32    | 1     | 4    | 4      | 2      | 0.125  | 1.0625 | 8     | 0.5    | 32  | 4    | 0.1875  |
| Y182 | 16    | 1     | 2    | 2     | 1.06  | 2    | 0.0075 | 1      | 1      | 1.0038 | 2     | 0.125  | 16  | 8    | 0.5625  |
| Y183 | 16    | 2     | 1    | 0.5   | 0.625 | 2    | 0.06   | 0.125  | 0.0313 | 0.28   | 2     | 0.015  | 2   | 0.5  | 0.2575  |
| Y184 | 16    | 16    | 32   | 16    | 1.5   | 32   | 16     | 4      | 1      | 0.75   | 32    | 8      | 32  | 8    | 0.5     |
| Y186 | 16    | 2     | 64   | 32    | 0.625 | 4    | 4      | 8      | 0.0313 | 1      | 4     | 4      | 64  | 0.25 | 1       |
| Y189 | 0.125 | 0.125 | 0.03 | 0.03  | 2     | 1    | 0.125  | 0.25   | 0.0313 | 0.25   | 1     | 0.06   | 1   | 0.25 | 0.31    |
| Y193 | 16    | 0.5   | 64   | 2     | 0.06  | 4    | 4      | 4      | 0.0313 | 1      | 4     | 0.125  | 32  | 16   | 0.53125 |
| Y200 | 1     | 1     | 0.5  | 0.5   | 2     | 2    | 0.125  | 0.25   | 0.0313 | 0.1875 | 2     | 0.25   | 1   | 0.25 | 0.375   |
| Y208 | 16    | 8     | 64   | 0.5   | 0.5   | 4    | 1      | 4      | 2      | 0.75   | 4     | 1      | 32  | 2    | 0.3125  |
| Y209 | 2     | 4     | 64   | 0.03  | 2     | 4    | 4      | 8      | 0.0313 | 1.0039 | 4     | 4      | 64  | 0.25 | 1.0039  |
| Y214 | 2     | 2     | 32   | 8     | 1.25  | 1    | 1      | 4      | 0.0313 | 1.01   | 0.5   | 0.125  | 32  | 16   | 0.75    |
| Y218 | 8     | 8     | 64   | 2     | 1.03  | 0.5  | 0.125  | 4      | 0.125  | 0.2813 | 0.125 | 0.03   | 32  | 0.25 | 0.25    |
| Y220 | 16    | 4     | 2    | 0.125 | 0.31  | 0.5  | 0.25   | 1      | 0.0313 | 0.5313 | 0.5   | 0.125  | 4   | 1    | 0.5     |
| Y223 | 1     | 2     | 16   | 8     | 2.5   | 0.5  | 0.015  | 4      | 0.125  | 0.0613 | 0.5   | 0.015  | 32  | 1    | 0.06125 |
| Y252 | 2     | 2     | 16   | 0.03  | 1     | 4    | 2      | 8      | 0.0313 | 0.5    | 4     | 2      | 64  | 0.25 | 0.5     |
| Y253 | 0.5   | 0.5   | 0.5  | 0.25  | 1.5   | 1    | 0.0075 | 0.0625 | 0.0313 | 0.5075 | 1     | 0.0075 | 0.5 | 0.25 | 0.5075  |
| Y256 | 8     | 4     | 32   | 1     | 0.53  | 1    | 0.5    | 4      | 0.0625 | 0.5156 | 1     | 0.25   | 32  | 8    | 0.5     |
| Y258 | 2     | 2     | 64   | 32    | 1.5   | 4    | 1      | 4      | 0.0313 | 0.2578 | 2     | 1      | 32  | 0.25 | 0.5078  |
| Y259 | 2     | 1     | 32   | 32    | 1.5   | 4    | 0.25   | 8      | 2      | 0.3125 | 4     | 4      | 64  | 0.25 | 1.0039  |
| Y260 | 16    | 0.125 | 8    | 16    | 2     | 0.5  | 0.0075 | 2      | 2      | 1.015  | 1     | 0.5    | 16  | 8    | 1       |

Table S3. MIC and FICI results of 90 MTB isolates by the checkerboard titration methods for MXF and Pa, and MXF and Pa combined with RFB or RFP combinations

| MTB isolates ID | MXF (MIC alone) | MXF (MIC combination) | Pa (MIC alone) | Pa (MIC combination) | FICI  | MXF (MIC combination) | Pa (MIC combination) | RFB (MIC alone) | RFB (MIC combination) | FICI  | MXF (MIC combination) | Pa (MIC combination) | RFP (MIC alone) | RFP (MIC combination) | FICI |
|-----------------|-----------------|-----------------------|----------------|----------------------|-------|-----------------------|----------------------|-----------------|-----------------------|-------|-----------------------|----------------------|-----------------|-----------------------|------|
| Y1              | 0.25            | 0.5                   | 4              | 0.0075               | 2     | 0.125                 | 0.0075               | 0.25            | 0.125                 | 1     | 0.06                  | 0.0075               | 16              | 1                     | 0.3  |
| Y2              | 0.125           | 0.06                  | 4              | 0.0075               | 0.48  | 0.06                  | 0.0075               | 0.125           | 0.0313                | 0.73  | 0.03                  | 8                    | 4               | 1                     | 2.25 |
| Y3              | 0.5             | 1                     | 8              | 0.0075               | 2     | 1                     | 0.0075               | 0.125           | 0.0313                | 2.25  | 0.03                  | 8                    | 4               | 1                     | 2.37 |
| Y4              | 1               | 0.5                   | 8              | 2                    | 0.75  | 0.5                   | 0.125                | 0.125           | 0.0313                | 0.76  | 0.25                  | 2                    | 4               | 1                     | 1.25 |
| Y5              | 0.5             | 0.5                   | 4              | 1                    | 1.25  | 0.5                   | 0.5                  | 0.125           | 0.0313                | 1.375 | 0.125                 | 4                    | 4               | 1                     | 1.5  |
| Y6              | 0.5             | 1                     | 8              | 0.0075               | 2     | 1                     | 0.0075               | 0.125           | 0.0313                | 2.25  | 0.5                   | 0.125                | 4               | 1                     | 1.26 |
| Y7              | 0.5             | 0.5                   | 4              | 2                    | 1.5   | 0.5                   | 0.03                 | 0.125           | 0.0313                | 1.25  | 0.5                   | 0.125                | 4               | 1                     | 1.26 |
| Y11             | 0.03            | 0.03                  | 1              | 0.0075               | 1     | 0.03                  | 0.0075               | 0.125           | 0.0313                | 1.25  | 0.03                  | 0.0075               | 2               | 1                     | 1.25 |
| Y12             | 0.125           | 0.06                  | 8              | 0.25                 | 0.51  | 0.06                  | 0.5                  | 0.125           | 0.0313                | 0.79  | 0.03                  | 0.0075               | 4               | 1                     | 1.25 |
| Y15             | 0.125           | 0.125                 | 8              | 0.0075               | 1     | 0.125                 | 0.0075               | 0.125           | 0.0313                | 1.25  | 0.03                  | 0.0075               | 4               | 1                     | 1.5  |
| Y16             | 0.5             | 1                     | 8              | 0.0075               | 2     | 1                     | 0.0075               | 0.125           | 0.0313                | 2.25  | 0.03                  | 4                    | 4               | 1                     | 1.31 |
| Y17             | 0.5             | 0.25                  | 4              | 2                    | 1     | 0.125                 | 0.5                  | 0.5             | 0.125                 | 0.625 | 0.125                 | 1                    | 4               | 1                     | 0.75 |
| Y29             | 1               | 2                     | 8              | 0.0075               | 2     | 1                     | 0.0075               | 1               | 0.125                 | 1.125 | 2                     | 0.0075               | 4               | 1                     | 4.25 |
| Y37             | 0.03            | 0.06                  | 8              | 0.0075               | 2     | 0.125                 | 0.0075               | 1               | 0.125                 | 4.29  | 0.03                  | 0.06                 | 4               | 1                     | 1.25 |
| Y46             | 0.06            | 0.06                  | 8              | 0.0075               | 1     | 0.06                  | 0.0075               | 1               | 0.125                 | 1.125 | 0.03                  | 0.0075               | 4               | 1                     | 0.75 |
| Y47             | 1               | 0.03                  | 8              | 4                    | 0.53  | 2                     | 0.0075               | 1               | 0.125                 | 2.125 | 2                     | 0.0075               | 4               | 1                     | 2.25 |
| Y48             | 0.5             | 1                     | 8              | 0.0075               | 2     | 1                     | 0.0075               | 1               | 0.125                 | 2.125 | 0.03                  | 0.0075               | 4               | 1                     | 0.31 |
| Y49             | 2               | 2                     | 8              | 0.0075               | 1     | 2                     | 0.0075               | 0.125           | 0.0313                | 1.25  | 0.06                  | 2                    | 4               | 1                     | 0.62 |
| Y50             | 0.03            | 0.06                  | 8              | 0.0075               | 2     | 0.06                  | 0.0075               | 1               | 0.125                 | 2.125 | 0.03                  | 0.0075               | 4               | 1                     | 1.25 |
| Y51             | 1               | 1                     | 2              | 0.25                 | 1.125 | 0.03                  | 0.5                  | 0.25            | 0.125                 | 0.78  | 1                     | 1                    | 4               | 1                     | 1.75 |
| Y52             | 0.03            | 0.03                  | 1              | 0.0075               | 1     | 0.03                  | 0.0075               | 0.25            | 0.125                 | 1.5   | 0.03                  | 0.06                 | 4               | 1                     | 1.31 |
| Y53             | 0.03            | 0.06                  | 8              | 0.0075               | 2     | 0.06                  | 0.0075               | 1               | 0.125                 | 2.125 | 0.03                  | 0.0075               | 4               | 1                     | 1.25 |
| Y54             | 2               | 1                     | 8              | 4                    | 1     | 1                     | 1                    | 0.125           | 0.0313                | 0.875 | 0.125                 | 4                    | 4               | 1                     | 1.31 |
| Y55             | 0.06            | 0.06                  | 1              | 0.0075               | 1     | 0.06                  | 0.0075               | 0.125           | 0.0313                | 1.25  | 0.03                  | 0.0075               | 1               | 0.5                   | 0.74 |

|      |       |       |     |        |        |       |        |        |        |       |       |        |   |   |       |
|------|-------|-------|-----|--------|--------|-------|--------|--------|--------|-------|-------|--------|---|---|-------|
| Y56  | 1     | 2     | 8   | 0.0075 | 2      | 2     | 0.0075 | 1      | 0.125  | 2.125 | 0.06  | 0.125  | 4 | 1 | 0.4   |
| Y57  | 1     | 1     | 1   | 0.125  | 1.125  | 1     | 0.03   | 0.125  | 0.0313 | 1.28  | 1     | 0.5    | 4 | 1 | 2.5   |
| Y58  | 1     | 1     | 8   | 1      | 1.125  | 0.03  | 0.0075 | 2      | 0.125  | 0.09  | 1     | 0.125  | 4 | 1 | 1.26  |
| Y59  | 0.25  | 0.5   | 0.5 | 0.0075 | 2.015  | 0.25  | 0.125  | 0.125  | 0.0313 | 1.5   | 0.25  | 0.03   | 4 | 1 | 1.37  |
| Y60  | 1     | 2     | 1   | 0.0075 | 2      | 1     | 0.06   | 2      | 0.125  | 1.12  | 1     | 0.06   | 4 | 1 | 1.265 |
| Y61  | 0.5   | 0.5   | 4   | 4      | 2      | 0.03  | 0.0075 | 0.25   | 0.125  | 0.56  | 0.03  | 4      | 4 | 1 | 1.31  |
| Y62  | 0.125 | 0.125 | 8   | 0.0075 | 1      | 0.25  | 0.5    | 0.5    | 0.125  | 2.06  | 0.25  | 0.0075 | 4 | 1 | 2.25  |
| Y63  | 0.5   | 1     | 2   | 0.015  | 2      | 1     | 0.0075 | 0.25   | 0.125  | 2.5   | 1     | 0.0075 | 4 | 1 | 2.25  |
| Y65  | 0.25  | 0.25  | 0.5 | 0.25   | 1.5    | 0.25  | 0.25   | 0.125  | 0.0313 | 1.75  | 0.5   | 0.125  | 4 | 1 | 2.31  |
| Y68  | 0.5   | 0.5   | 8   | 0.0075 | 1      | 1     | 0.0075 | 0.25   | 0.125  | 2.5   | 0.5   | 0.0075 | 2 | 1 | 1.5   |
| Y71  | 2     | 2     | 8   | 0.015  | 1      | 2     | 0.015  | 0.125  | 0.0313 | 1.25  | 0.5   | 8      | 2 | 1 | 6.5   |
| Y72  | 0.125 | 0.25  | 1   | 0.06   | 2.06   | 0.03  | 0.5    | 4      | 0.25   | 0.8   | 0.25  | 2      | 4 | 1 | 4.25  |
| Y73  | 4     | 0.25  | 4   | 0.5    | 0.18   | 0.03  | 0.0075 | 0.25   | 0.125  | 0.5   | 2     | 0.5    | 4 | 1 | 0.87  |
| Y76  | 0.5   | 0.03  | 8   | 8      | 1.06   | 0.5   | 0.5    | 0.125  | 0.0313 | 1.31  | 2     | 0.0075 | 4 | 1 | 4.26  |
| Y78  | 1     | 1     | 4   | 4      | 2      | 2     | 0.0075 | 2      | 1      | 2.5   | 2     | 0.0075 | 4 | 1 | 2.25  |
| Y79  | 1     | 1     | 4   | 0.125  | 1.03   | 0.03  | 0.0075 | 0.25   | 0.125  | 0.28  | 2     | 0.0075 | 4 | 1 | 2.25  |
| Y80  | 0.06  | 0.125 | 8   | 0.0075 | 2.08   | 0.25  | 0.0075 | 0.25   | 0.125  | 4.6   | 0.125 | 0.0075 | 4 | 1 | 2.3   |
| Y81  | 1     | 1     | 2   | 0.06   | 1.03   | 2     | 0.0075 | 0.25   | 0.125  | 2.5   | 2     | 1      | 4 | 1 | 2.75  |
| Y83  | 2     | 1     | 16  | 16     | 1.5    | 1     | 16     | 2      | 0.0313 | 1.51  | 1     | 0.0075 | 2 | 1 | 1.5   |
| Y84  | 0.06  | 0.03  | 8   | 8      | 1.5    | 0.125 | 0.0075 | 0.125  | 0.0313 | 2.3   | 0.03  | 0.25   | 8 | 4 | 1.25  |
| Y85  | 0.06  | 0.06  | 4   | 0.06   | 1.015  | 0.06  | 0.06   | 0.125  | 0.0313 | 1.265 | 1.06  | 1      | 4 | 1 | 0.98  |
| Y88  | 0.5   | 0.5   | 8   | 0.5    | 1.0625 | 1     | 0.5    | 1      | 0.125  | 2.18  | 1     | 1      | 8 | 1 | 1.375 |
| Y89  | 0.5   | 1     | 8   | 0.015  | 2      | 2     | 0.0075 | 1      | 0.125  | 4.125 | 0.03  | 0.0075 | 4 | 1 | 0.31  |
| Y94  | 0.03  | 0.06  | 8   | 0.0075 | 2      | 0.06  | 0.0075 | 0.125  | 0.0313 | 2.25  | 0.25  | 8      | 2 | 1 | 3.5   |
| Y95  | 0.5   | 0.03  | 8   | 1      | 0.185  | 0.5   | 4      | 4      | 0.125  | 1.53  | 2     | 0.0075 | 4 | 1 | 4.25  |
| Y97  | 0.5   | 0.5   | 1   | 0.06   | 1.06   | 0.25  | 0.25   | 0.125  | 0.0313 | 1     | 0.125 | 0.5    | 4 | 1 | 1.25  |
| Y98  | 0.03  | 0.06  | 1   | 0.0075 | 2      | 0.03  | 0.0075 | 0.0625 | 0.0313 | 1.5   | 1     | 0.125  | 4 | 1 | 2.37  |
| Y105 | 0.25  | 0.5   | 4   | 0.0075 | 2      | 0.03  | 0.0075 | 1      | 0.5    | 0.62  | 1     | 0.0075 | 2 | 1 | 4.5   |
| Y107 | 0.03  | 0.06  | 1   | 0.0075 | 2      | 0.06  | 0.0075 | 1      | 0.125  | 2.125 | 0.03  | 0.0075 | 4 | 1 | 1.25  |

|      |       |       |      |        |        |       |        |       |        |        |       |        |    |   |       |
|------|-------|-------|------|--------|--------|-------|--------|-------|--------|--------|-------|--------|----|---|-------|
| Y108 | 0.125 | 0.125 | 1    | 0.0075 | 1      | 0.25  | 0.0075 | 1     | 0.125  | 2.125  | 0.06  | 0.125  | 4  | 1 | 0.855 |
| Y109 | 1     | 2     | 8    | 0.0075 | 2      | 1     | 0.0075 | 0.125 | 0.0313 | 1.25   | 1     | 0.0075 | 4  | 1 | 2.25  |
| Y111 | 0.06  | 0.06  | 2    | 0.06   | 1.03   | 0.06  | 0.125  | 0.125 | 0.0313 | 1.3125 | 0.5   | 0.03   | 2  | 1 | 4.53  |
| Y112 | 0.125 | 0.25  | 16   | 0.0075 | 2      | 0.03  | 8      | 1     | 0.125  | 0.865  | 0.25  | 0.0075 | 4  | 2 | 2.5   |
| Y114 | 0.03  | 0.06  | 8    | 0.0075 | 2      | 0.06  | 0.0075 | 1     | 0.125  | 2.125  | 0.03  | 0.0075 | 4  | 1 | 1.25  |
| Y116 | 0.03  | 0.03  | 8    | 0.0075 | 1      | 0.06  | 0.0075 | 1     | 0.125  | 2.125  | 0.03  | 0.0075 | 4  | 1 | 1.25  |
| Y117 | 0.5   | 0.5   | 16   | 0.0075 | 1      | 1     | 0.0075 | 0.5   | 0.125  | 2.25   | 2     | 0.0075 | 32 | 1 | 4.03  |
| Y118 | 0.03  | 0.06  | 8    | 0.0075 | 2      | 0.06  | 0.0075 | 1     | 0.125  | 2.125  | 0.03  | 0.0075 | 4  | 1 | 1.25  |
| Y121 | 0.5   | 0.5   | 8    | 0.06   | 1      | 0.5   | 0.03   | 0.125 | 0.0313 | 1.25   | 0.25  | 0.25   | 4  | 1 | 2.31  |
| Y122 | 0.25  | 0.5   | 8    | 0.0075 | 2      | 0.03  | 0.0075 | 0.125 | 0.0313 | 0.37   | 0.125 | 8      | 2  | 1 | 4.58  |
| Y123 | 1     | 2     | 16   | 1      | 2.0625 | 2     | 0.0075 | 0.125 | 0.0313 | 2.25   | 2     | 0.0075 | 2  | 1 | 2.5   |
| Y125 | 2     | 2     | 8    | 4      | 1.5    | 2     | 0.06   | 0.125 | 0.0313 | 1.25   | 1     | 0.125  | 16 | 1 | 1.31  |
| Y126 | 4     | 0.5   | 4    | 0.06   | 0.14   | 0.06  | 0.06   | 0.5   | 0.125  | 0.28   | 0.25  | 0.125  | 16 | 1 | 0.15  |
| Y144 | 0.03  | 0.06  | 8    | 0.0075 | 2      | 0.06  | 0.0075 | 0.125 | 0.0313 | 2.25   | 0.5   | 0.125  | 2  | 1 | 2.53  |
| Y158 | 0.25  | 1     | 8    | 0.0075 | 4      | 1     | 0.0075 | 4     | 0.125  | 4.03   | 1     | 0.0075 | 4  | 1 | 4.25  |
| Y162 | 1     | 0.5   | 4    | 1      | 0.75   | 0.03  | 0.06   | 0.25  | 0.125  | 0.52   | 0.25  | 1      | 4  | 1 | 0.75  |
| Y165 | 0.5   | 1     | 8    | 0.0075 | 2      | 2     | 0.0075 | 1     | 0.125  | 4.125  | 0.25  | 2      | 16 | 1 | 0.81  |
| Y170 | 0.25  | 0.25  | 16   | 1      | 1.0625 | 2     | 0.125  | 2     | 0.125  | 0.6875 | 0.06  | 0.03   | 16 | 1 | 0.24  |
| Y182 | 0.03  | 0.06  | 2    | 0.0075 | 2      | 0.06  | 0.0075 | 2     | 0.125  | 2.06   | 2     | 0.0075 | 4  | 1 | 4.25  |
| Y183 | 0.03  | 0.06  | 8    | 0.0075 | 2      | 0.03  | 0.0075 | 1     | 0.125  | 1.125  | 2     | 0.0075 | 4  | 1 | 2.25  |
| Y184 | 0.25  | 0.5   | 16   | 0.0075 | 2      | 0.5   | 0.0075 | 1     | 0.125  | 2.125  | 0.5   | 0.0075 | 8  | 1 | 2.125 |
| Y186 | 0.06  | 0.125 | 8    | 0.0075 | 2.08   | 0.25  | 0.0075 | 4     | 0.125  | 4.19   | 0.5   | 0.0075 | 32 | 1 | 2.03  |
| Y189 | 0.03  | 0.03  | 0.03 | 0.0075 | 1.25   | 0.03  | 0.0075 | 0.25  | 0.125  | 1.75   | 0.03  | 0.0075 | 2  | 1 | 1.75  |
| Y193 | 1     | 2     | 16   | 0.0075 | 2      | 0.125 | 0.0075 | 2     | 0.125  | 4.12   | 0.06  | 0.0075 | 4  | 1 | 2.25  |
| Y200 | 0.06  | 0.03  | 2    | 0.0075 | 0.5    | 0.03  | 0.0075 | 1     | 0.125  | 0.625  | 1     | 0.0075 | 4  | 1 | 0.5   |
| Y208 | 1     | 2     | 16   | 4      | 2.25   | 2     | 2      | 1     | 0.125  | 2.25   | 0.25  | 0.5    | 16 | 1 | 0.43  |
| Y209 | 0.125 | 0.125 | 16   | 0.0075 | 1      | 0.06  | 0.0075 | 1     | 0.125  | 0.625  | 0.06  | 0.0075 | 4  | 1 | 0.73  |
| Y214 | 0.125 | 0.03  | 1    | 0.5    | 0.74   | 0.25  | 0.25   | 1     | 0.125  | 2.375  | 0.03  | 4      | 16 | 1 | 4.24  |
| Y218 | 0.03  | 0.03  | 8    | 0.0075 | 1      | 0.06  | 0.0075 | 4     | 0.125  | 2.03   | 0.03  | 0.0075 | 32 | 1 | 1.03  |



|      |      |       |     |        |      |      |        |      |       |       |       |        |   |   |       |
|------|------|-------|-----|--------|------|------|--------|------|-------|-------|-------|--------|---|---|-------|
| Y220 | 1    | 1     | 16  | 8      | 1.5  | 0.03 | 0.0075 | 2    | 1     | 0.53  | 1     | 8      | 2 | 1 | 2     |
| Y223 | 0.25 | 0.06  | 0.5 | 0.25   | 0.74 | 0.03 | 0.25   | 0.5  | 0.25  | 1.12  | 0.03  | 0.06   | 4 | 1 | 0.49  |
| Y252 | 0.5  | 1     | 16  | 1      | 2.06 | 2    | 0.25   | 2    | 1     | 4.51  | 0.125 | 0.015  | 4 | 2 | 0.75  |
| Y253 | 1    | 2     | 16  | 0.0075 | 2    | 2    | 0.0075 | 0.25 | 0.125 | 2.5   | 0.03  | 0.0075 | 4 | 1 | 0.28  |
| Y256 | 0.5  | 0.5   | 4   | 4      | 2    | 0.06 | 0.125  | 2    | 1     | 0.65  | 0.03  | 0.0075 | 8 | 1 | 0.18  |
| Y258 | 0.5  | 1     | 16  | 8      | 2.5  | 2    | 4      | 1    | 0.5   | 4.75  | 0.25  | 0.06   | 4 | 1 | 0.75  |
| Y259 | 0.25 | 0.125 | 8   | 4      | 1    | 0.03 | 0.0075 | 2    | 1     | 0.62  | 0.03  | 0.0075 | 8 | 1 | 0.185 |
| Y260 | 0.5  | 2     | 8   | 0.0075 | 4    | 2    | 0.0075 | 1    | 0.125 | 4.125 | 0.03  | 0.0075 | 4 | 1 | 0.31  |
